# Supplementary material
Source: publisher figshare collection journal article supplement (https://acs.figshare.com/ndownloader/files/4589830)
Supplement: Supplementary file 1 [file 4589830]

## Supporting Information

### 3,3'- and 4,4'-Biphenylene Bridged Subporphyrin Dimers

Yasuhide Inokuma and Atsuhiko Osuka\*

*Department of Chemistry, Graduate School of Science, Kyoto University, Sakyo-ku, Kyoto 606-8502,  
Japan*

#### Contents

1. Experimental procedure
2.  $^1\text{H}$  NMR spectra
3. Cyclic voltammetry
4. MO diagram
5. Optimized structures
6. References

## 1. Experimental procedure

### General

All reagents and solvents were of commercial reagent grade and were used without further purification.  $^1\text{H}$ ,  $^{11}\text{B}$ , and  $^{13}\text{C}$  NMR spectra were recorded on a JEOL delta-600 spectrometer, and chemical shifts were reported as the delta scale in ppm relative to internal standards ( $\text{CHCl}_3$  ( $\delta = 7.26$  ppm for  $^1\text{H}$ , 77.16 ppm for  $^{13}\text{C}$ ), and an external standard,  $\text{BF}_3\cdot\text{OEt}_2$  in  $\text{CDCl}_3$  ( $\delta = 0.00$  ppm for  $^{11}\text{B}$ )). Spectroscopic grade solvents were used for all spectroscopic studies without further purification. UV/visible absorption spectra were recorded on a Shimadzu UV-3100 spectrometer. Fluorescence spectra were recorded on a Hamamatsu Photonics C9920-02 spectrometer, and absolute fluorescence quantum yields were measured by photon-counting method using an integration sphere. ESI-TOF-MS spectra were recorded on a BRUKER DALTONICS microTOF LC using positive-ion mode. Thin layer chromatography (TLC) was performed on a silica gel sheet, MERCK silica gel 60 F<sub>254</sub>. Preparative separations were performed by silica gel gravity column chromatography (Wako gel C-300) or size exclusion gel permeation chromatography (GPC) (Bio-Rad Bio-Beads S-X1, packed with THF).

Pyridine-tri-*N*-pyrrolylborane was prepared by the reported procedure.<sup>51</sup> Dry *N,N*-dimethylformamide was distilled from  $\text{CaH}_2$ .

#### 4,4'-Biphenylene bridged dimer **1**

To a suspension of pyridine-tri-*N*-pyrrolylborane (1.50 g, 5.21 mmol) in 1,2-dichlorobenzene 225 ml, were added benzaldehyde (1.12 ml, 11.00 mmol) and 4-bromobenzaldehyde (0.83 g, 4.50 mmol), and the mixture was cooled to 0 °C with an ice/water bath. After dropwise addition of trifluoroacetic acid (0.50 ml, 6.73 mmol) *via* syringe, the solution was stirred for 1 h at 0 °C under N<sub>2</sub>. The acid was quenched with 0.60 ml of pyridine, and the resulting solution was refluxed for 1 h under aerobic conditions. After the solution was cooled to room temperature, the solvent was removed in vacuo. To the residual black tar, a mixture of THF/MeOH (1:1) 50 ml was added and heated at 50 °C for 10 min. After the removal of insoluble materials by filtration, the solvent was once evaporated, and the residue was mounted onto a GPC column (6 × 40 cm, packed with THF) with a minimal amount of THF. Polymeric byproducts that eluted first was removed and the yellowish fractions that eluted around R<sub>f</sub> = 0.50 on TLC (silica gel; eluent: CH<sub>2</sub>Cl<sub>2</sub>/hexane/ether=1:2:1) were collected. After passing through a short silica gel column (eluent: CH<sub>2</sub>Cl<sub>2</sub>/hexane/ether=1:1:1), the crude mixture was dissolved in 30 ml of CH<sub>2</sub>Cl<sub>2</sub> and treated with 10 g of MnO<sub>2</sub> at room temperature overnight with vigorous stirring. The oxidant was removed by passing the suspension through a short Celite<sup>®</sup> pad. Further purification by silica gel column chromatography (eluent: CH<sub>2</sub>Cl<sub>2</sub>/hexane/ether=1:2:1) gave a crude mixture of subporphyrins as orange-brown solid.

A 50 ml Schlenk tube was charged with the subporphyrin mixture, dry DMF (5 ml) NiCl<sub>2</sub>(diphenylphosphinopropane) (25 mg, 46 μmol), zinc powder (100 mg), and potassium iodide (100 mg). The resulting solution was deoxygenated *via* three freeze-pump-thaw cycles, and then stirred at 80 °C for 12 h under N<sub>2</sub> atmosphere. The resulting mixture was filtered, the filtrate was poured into 50 ml of water, and the products were extracted with CH<sub>2</sub>Cl<sub>2</sub> (20 ml × 3). Combined organic layer was washed with brine and water, dried over Na<sub>2</sub>SO<sub>4</sub>, and the solvent was evaporated. The products were separated by GPC column (4 × 90 cm) to give dimer **1** as the second-to-last fraction and triphenylsubporphyrin **3** as the last fraction. Recrystallization from CH<sub>2</sub>Cl<sub>2</sub>/MeOH afforded **1** (30 mg, 1.3%) and **3** (62 mg, 2.4%) as orange crystalline solids.

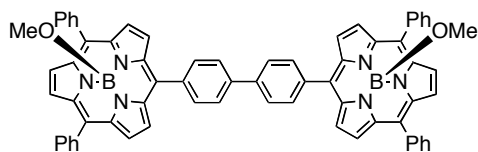

$^1\text{H}$  NMR (600 MHz,  $\text{CDCl}_3$ )  $\delta$  (ppm) 8.27 (d,  $J$  = 8.2 Hz, 4H, biphenylene bridge), 8.26 (d,  $J$  = 4.6 Hz, 4H,  $\beta$ -H), 8.18 (d,  $J$  = 4.6 Hz, 4H,  $\beta$ -H), 8.15 (d,  $J$  = 8.2 Hz, 4H, biphenylene bridge), 8.15 (s, 4H,  $\beta$ -H), 8.10 (d,  $J$  = 7.4 Hz, 8H, *meso*-Ph-*o*-H), 7.72 (t,  $J$  = 7.8 Hz, 8H, *meso*-Ph-*m*-H), 7.63 (t,  $J$  = 7.3 Hz, 4H, *meso*-Ph-*p*-H), and 0.89 (s, 6H, axial-OMe);  $^{11}\text{B}$  NMR (193 MHz,  $\text{CDCl}_3$ )  $\delta$  (ppm) -15.2 (s, 2B);  $^{13}\text{C}$  NMR (150 MHz,  $\text{CDCl}_3$ )  $\delta$  (ppm) 141.2, 141.1, 140.5, 140.1, 137.3, 136.8, 133.9, 133.3, 128.8, 128.0, 127.6, 122.6, 122.5, 122.4, 122.3, 120.8 and 46.9 (axial- $\text{OCH}_3$ ); HR-ESI TOF-MS (positive mode)  $m/z$  = 969.3696 (calcd. for  $\text{C}_{67}\text{O}_1\text{H}_{43}\text{N}_6\text{B}_2$  = 969.3699 [ $\text{M}-\text{OMe}$ ] $^+$ ); UV-vis (in  $\text{CH}_2\text{Cl}_2$ )  $\lambda$  [nm]( $\epsilon$  [ $\text{M}^{-1}\text{cm}^{-1}$ ]) 379(263000), 463(29000), and 494(32000); Fluorescence (in  $\text{CH}_2\text{Cl}_2$ ,  $\lambda_{\text{ex}}$  = 379 nm);  $\lambda_{\text{max}}$  [nm] = 531,  $\Phi_{\text{F}}$  = 0.28.

### 3,3'-Biphenylene bridged dimer 2

3,3'-dimer was synthesized from pyridine-tri-*N*-pyrrolylborane (1.50 g, 5.21 mmol), benzaldehyde (1.12 ml, 11.00 mmol) and 3-bromobenzaldehyde (0.52 ml, 4.50 mmol) according to the same procedure as **1** in 1.0% yield (20 mg) along with triphenylsubporphyrin **3** (60 mg, 2.3%).

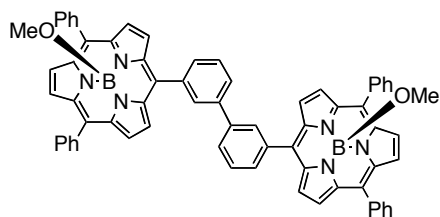

$^1\text{H}$  NMR (600 MHz,  $\text{CDCl}_3$ )  $\delta$  (ppm) 8.49 (s, 2H, biphenylene bridge), 8.21 (d,  $J$  = 4.6 Hz, 4H,  $\beta$ -H), 8.13 (d,  $J$  = 4.6 Hz, 4H,  $\beta$ -H), 8.12 (s, 4H,  $\beta$ -H), 8.10 (d,  $J$  = 7.8 Hz, 2H, biphenylene bridge), 8.06 (d,  $J$  = 7.3 Hz, 8H, *meso*-Ph-*o*-H), 8.03 (d,  $J$  = 7.8 Hz, 2H, biphenylene bridge), 7.84 (t,  $J$  = 7.8 Hz, 2H, biphenylene bridge), 7.69 (t,  $J$  = 7.8 Hz, 8H, *meso*-Ph-*m*-H), 7.61 (t,  $J$  = 7.3 Hz, 4H, *meso*-Ph-*p*-H), and 0.85 (s, 6H, axial-OMe);  $^{11}\text{B}$  NMR (193 MHz,  $\text{CDCl}_3$ )  $\delta$  (ppm) -15.2 (s, 2B);  $^{13}\text{C}$  NMR (150 MHz,  $\text{CDCl}_3$ )  $\delta$  (ppm) 141.4, 141.2, 141.1, 138.2, 137.7, 133.4, 132.6, 132.3, 129.4, 128.8,

127.9, 126.9, 122.5, 122.4 (2C), 120.8, 120.3, 119.9, and 47.0 (axial-OCH<sub>3</sub>); HR-ESI TOF-MS (positive mode)  $m/z$  = 969.3694, 1023.3789 (calcd. for C<sub>67</sub>O<sub>1</sub>H<sub>43</sub>N<sub>6</sub>B<sub>2</sub> = 969.3699 [M-OMe]<sup>+</sup>, C<sub>68</sub>O<sub>2</sub>H<sub>46</sub>N<sub>6</sub>B<sub>2</sub>Na = 1023.3781 [M+Na]<sup>+</sup>); UV-vis (in CH<sub>2</sub>Cl<sub>2</sub>)  $\lambda$  [nm]( $\epsilon$  [M<sup>-1</sup>cm<sup>-1</sup>]) 374(310000), 461(27000), and 486(21000); Fluorescence (in CH<sub>2</sub>Cl<sub>2</sub>,  $\lambda_{\text{ex}}$  = 374 nm);  $\lambda_{\text{max}}$  [nm] = 516,  $\Phi_{\text{F}}$  = 0.15.

### Cyclic dimer 5

Dimer **2** (4.8 mg, 5.0  $\mu$ mol) and biphenyl-3,3'-dicarboxylic acid (**4**) (1.2 mg, 5.0  $\mu$ mol) were dissolved in toluene 40 ml and refluxed with a Dean-Stark trap for 6 h. Evaporation of the solvent gave orange crystalline solid of **5** quantitatively.

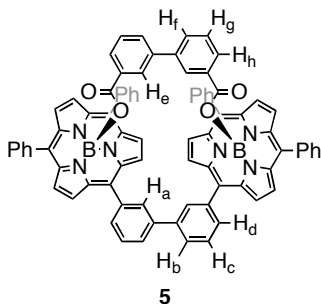

This material was stable in the solid state, however, it was partially hydrolyzed by adventitious water to release axial ligand after overnight storing in solution.

<sup>1</sup>H NMR (600 MHz, CDCl<sub>3</sub>)  $\delta$  (ppm) 9.27 (s, 2H, biphenylene H<sub>a</sub>), 8.24 (d,  $J$  = 4.6 Hz, 4H,  $\beta$ -H), 8.18 (s and d, 4 + 2H,  $\beta$ -H and biphenylene H<sub>d</sub>), 8.14 (d,  $J$  = 4.6 Hz, 4H,  $\beta$ -H), 8.08 (d,  $J$  = 6.9 Hz, 8H, *meso*-Ph-*o*-H), 7.81 (t,  $J$  = 7.8 Hz, 2H, biphenylene H<sub>c</sub>), 7.70–7.65 (t and d, 8 + 2H, *meso*-Ph-*m*-H and biphenylene H<sub>b</sub>), 7.60 (t,  $J$  = 7.3 Hz, 4H, *meso*-Ph-*p*-H), 6.97 (d,  $J$  = 7.4 Hz, 2H, axial ligand H<sub>f</sub>), 6.85 (d,  $J$  = 7.8 Hz, 2H, axial ligand H<sub>h</sub>), 6.82 (t,  $J$  = 7.8 Hz, 2H, axial ligand H<sub>g</sub>), and 6.75 (s, 2H, axial ligand H<sub>e</sub>); <sup>11</sup>B NMR (193 MHz, CDCl<sub>3</sub>)  $\delta$  (ppm) –15.2 (br s, 2B); HR-ESI TOF-MS (positive mode)  $m/z$  = 1179.4028 (calcd. for C<sub>80</sub>O<sub>4</sub>H<sub>49</sub>N<sub>6</sub>B<sub>2</sub> = 1179.4019 [M]<sup>+</sup>); UV-vis (in CH<sub>2</sub>Cl<sub>2</sub>)  $\lambda$  [nm]( $\epsilon$  [M<sup>-1</sup>cm<sup>-1</sup>]) 371(297000), 458(27000), and 481(17000); Fluorescence (in CH<sub>2</sub>Cl<sub>2</sub>,  $\lambda_{\text{ex}}$  = 374 nm);  $\lambda_{\text{max}}$  [nm] = 516,  $\Phi_{\text{F}}$  = 0.16.

## 2. $^1\text{H}$ NMR spectra

**Figure S1.**  $^1\text{H}$  NMR spectra of **1**, **2**, and **5** in  $\text{CDCl}_3$ .

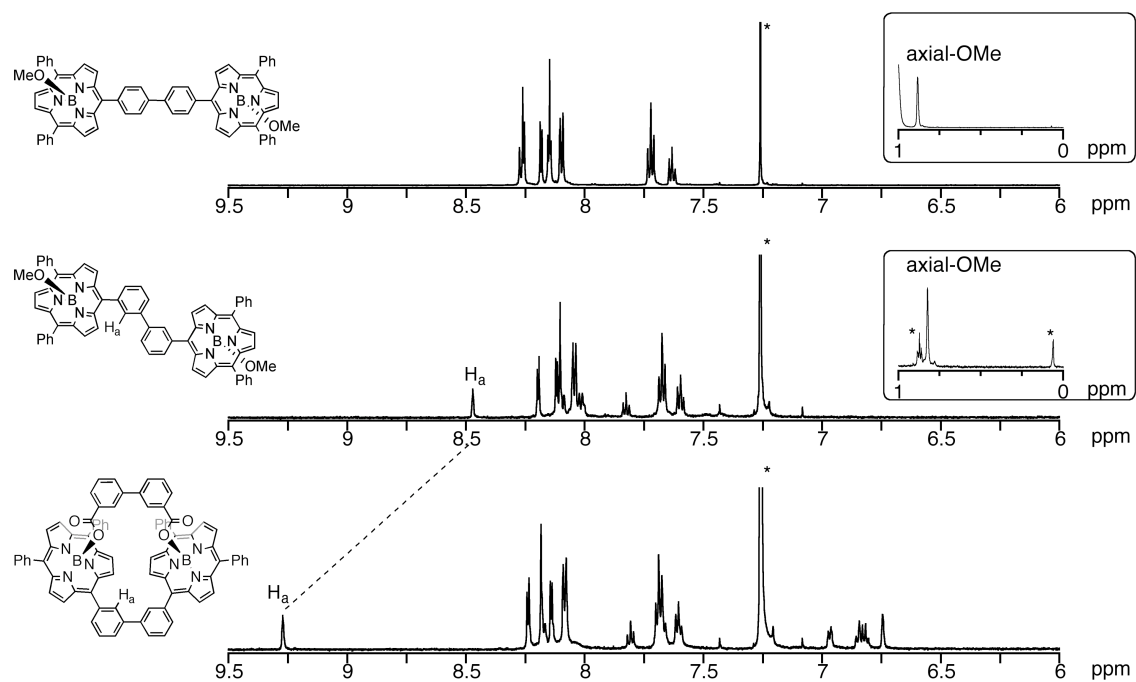

### 3. Cyclic voltammetry

**Figure S2.** Cyclic voltammograms of **1**, **2**, and **3** in  $\text{CH}_2\text{Cl}_2$  containing 0.10 M  $\text{Bu}_4\text{NPF}_6$ .

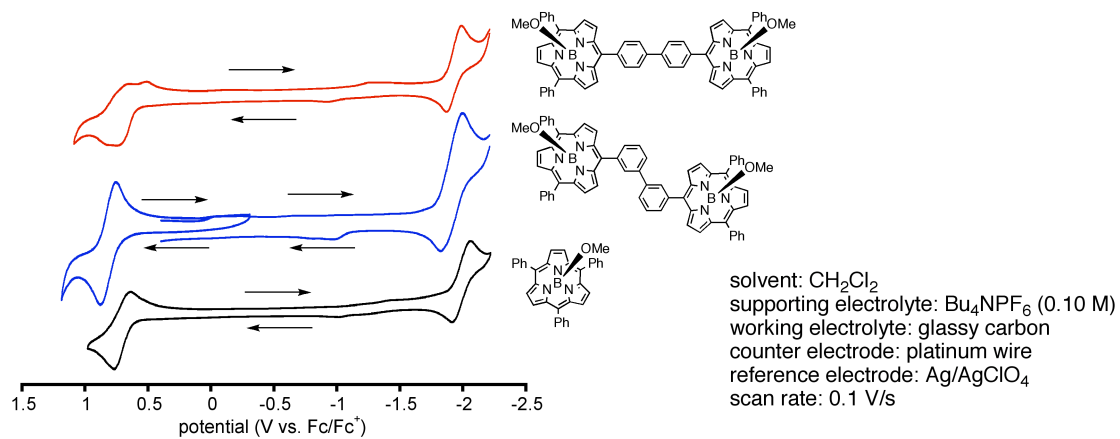

## 4. MO diagram

**Figure S3.** MO diagrams of **1** and **2** calculated at the B3LYP/6-31G\* level.<sup>S2</sup>

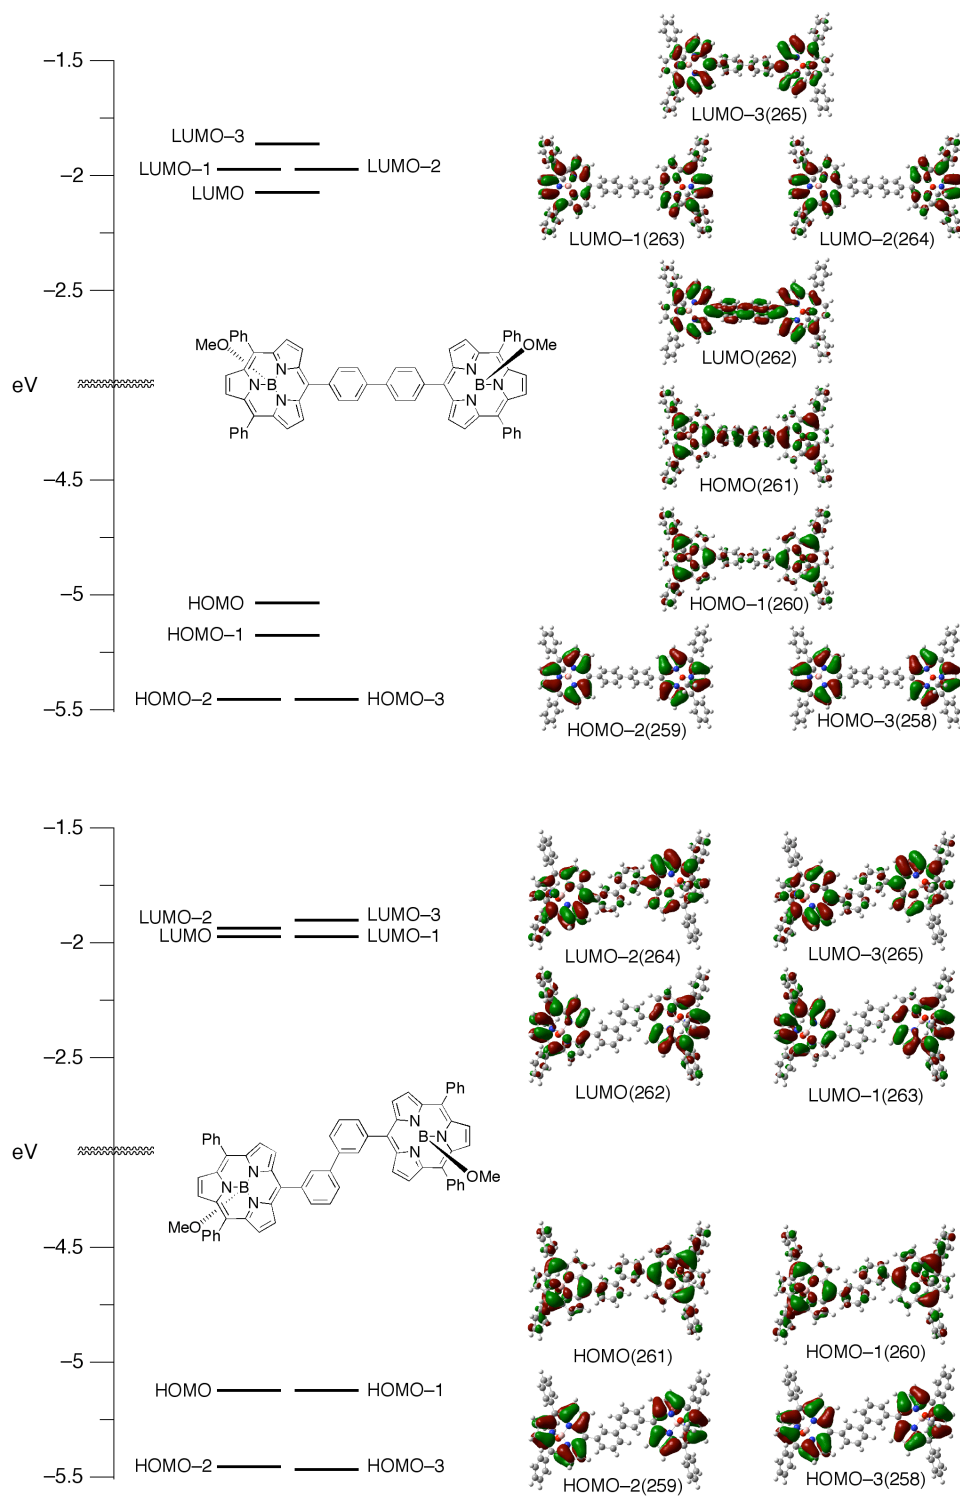



## 5. Optimized structures

**Figure S4.** Optimized structures of (a) **2** and (b) **5** at the B3LYP/6-31G\* level.

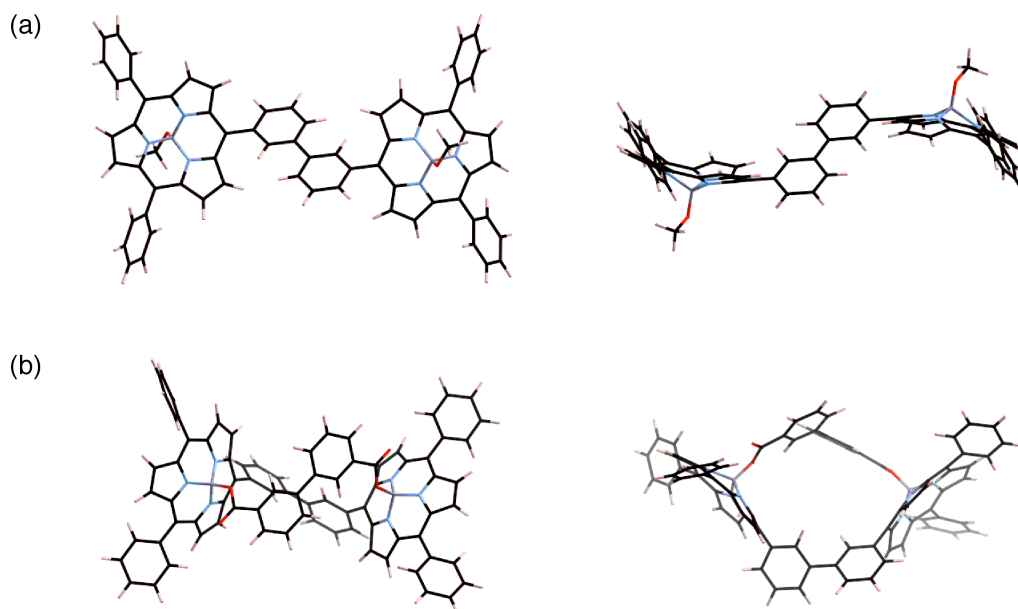

## 6. References

1. P. Szarvas, B. Györi and J. Emri *Acta. Chim. (Budapest)*, 1971, **70**, 1.
2. Gaussian 03, Revision C.02, Frisch, M. J.; Trucks, G. W.; Schlegel, H. B.; Scuseria, G. E.; Robb, M. A.; Cheeseman, J. R.; Montgomery, Jr., J. A.; Vreven, T.; Kudin, K. N.; Burant, J. C.; Millam, J. M.; Iyengar, S. S.; Tomasi, J.; Barone, V.; Mennucci, B.; Cossi, M.; Scalmani, G.; Rega, N.; Petersson, G. A.; Nakatsuji, H.; Hada, M.; Ehara, M.; Toyota, K.; Fukuda, R.; Hasegawa, J.; Ishida, M.; Nakajima, T.; Honda, Y.; Kitao, O.; Nakai, H.; Klene, M.; Li, X.; Knox, J. E.; Hratchian, H. P.; Cross, J. B.; Bakken, V.; Adamo, C.; Jaramillo, J.; Gomperts, R.; Stratmann, R. E.; Yazyev, O.; Austin, A. J.; Cammi, R.; Pomelli, C.; Ochterski, J. W.; Ayala, P. Y.; Morokuma, K.; Voth, G. A.; Salvador, P.; Dannenberg, J. J.; Zakrzewski, V. G.; Dapprich, S.; Daniels, A. D.; Strain, M. C.; Farkas, O.; Malick, D. K.; Rabuck, A. D.; Raghavachari, K.; Foresman, J. B.; Ortiz, J. V.; Cui, Q.; Baboul, A. G.; Clifford, S.; Cioslowski, J.; Stefanov, B. B.; Liu, G.; Liashenko, A.; Piskorz, P.; Komaromi, I.; Martin, R. L.; Fox, D. J.; Keith, T.; Al-Laham, M. A.; Peng, C. Y.; Nanayakkara, A.; Challacombe, M.; Gill, P. M. W.; Johnson, B.; Chen, W.; Wong, M. W.; Gonzalez, C.; and Pople, J. A.; Gaussian, Inc., Wallingford CT, 2004.
